# Supplementary material for: Involvement of reactive oxygen species in lanthanum-induced inhibition of primary root growth
Source: PubMed Central journal article supplement (PMC5100026; doi:10.1093/jxb/erw379), 2016-10-07
Supplement: supp_erw379_supplementary_table_S1_figures_S1_S6.pdf [file supp_erw379_supplementary_table_S1_figures_S1_S6.pdf]

## Supplemental files

**Table S1** List of the primers for qRT-PCR analysis of the genes.

| Gene             | Primers                                                          |
|------------------|------------------------------------------------------------------|
| <i>AtLBD29</i>   | 5'gctaggcttcaagatcccatc3'<br>5'tgtgetgcttgtgcttta ga3'           |
| <i>AtLBD16</i>   | 5'tgaccctgtttatggatgtgc3'<br>5'tgattgcaagaaagccacct3'            |
| <i>AtIAA14</i>   | 5'GCAGAGGAGGCAATGAGTAGTG3'<br>5'GAGCATCCAGTCACCATCTTTG3'         |
| <i>AtCYP79B2</i> | 5'CACGATGATGCTCGCGAGACT3'<br>5'TCACTTCACCGTCGGGTAGAGA3'          |
| <i>AtASA1</i>    | 5'ATGTCTTCCTCTATGAACGTAGC3'<br>5'ACAGCGGTAAATTGGTATAAGG3'        |
| <i>AtPAT1</i>    | 5'ATGGTTATTGCGGTGGCGAC3'<br>5'ATCGTCGCCGACTCAATGTC3'             |
| <i>AtAMI1</i>    | 5'CGGACTTACTCCAATGGCTCAG3'<br>5'GCTGCTGCAGGAGAACGCAACC3'         |
| <i>AtSUR1</i>    | 5'GACCACCAAGGTGTTACAATCC3'<br>5'ATTATTGTGGCAGGGTCAGG3'           |
| <i>AtTAA1</i>    | 5'CTCCAAGATCACAGGCCACGCTGGG3'<br>5'GACTCCTTAGACACACCAATCGAGTTC3' |
| <i>AtYUC2</i>    | 5'GGTGACACGGATCGGTTAGGGT3'<br>5'TGCCGAATAATGCATTACCCGT3'         |
| <i>AtYUC3</i>    | 5'CTTGAGATTGATTCCGTTATTC3<br>5'GGAGAAGAAGTCGTTGTC3'              |
| <i>AtYUC9</i>    | 5'ATCTTGCTAACCACAATG3'<br>5'CCACTTCATCATCATCAC3                  |
| <i>AtAAO1</i>    | 5'TGCCTGTTCCAGCAACAATG3'                                         |

|                |                                                        |
|----------------|--------------------------------------------------------|
|                | 5' TAAGCAGAACACCGCCATTG 3'                             |
| <i>AtAAO3</i>  | 5'GGAGTCAGCGAGGTGGAAGT3'<br>5'TGCTCCTTCGGTCTGTCCTAA3'  |
| <i>AtRBOHD</i> | 5'ATTACAAGCACCAAACCAG3'<br>5'TTCTCCGACCATCTCACTA3'     |
| <i>AtRBOHF</i> | 5'TCACAAATCAACGACGAGAGTT3'<br>5'CCCATCTTCATTCTTGTTCA3' |

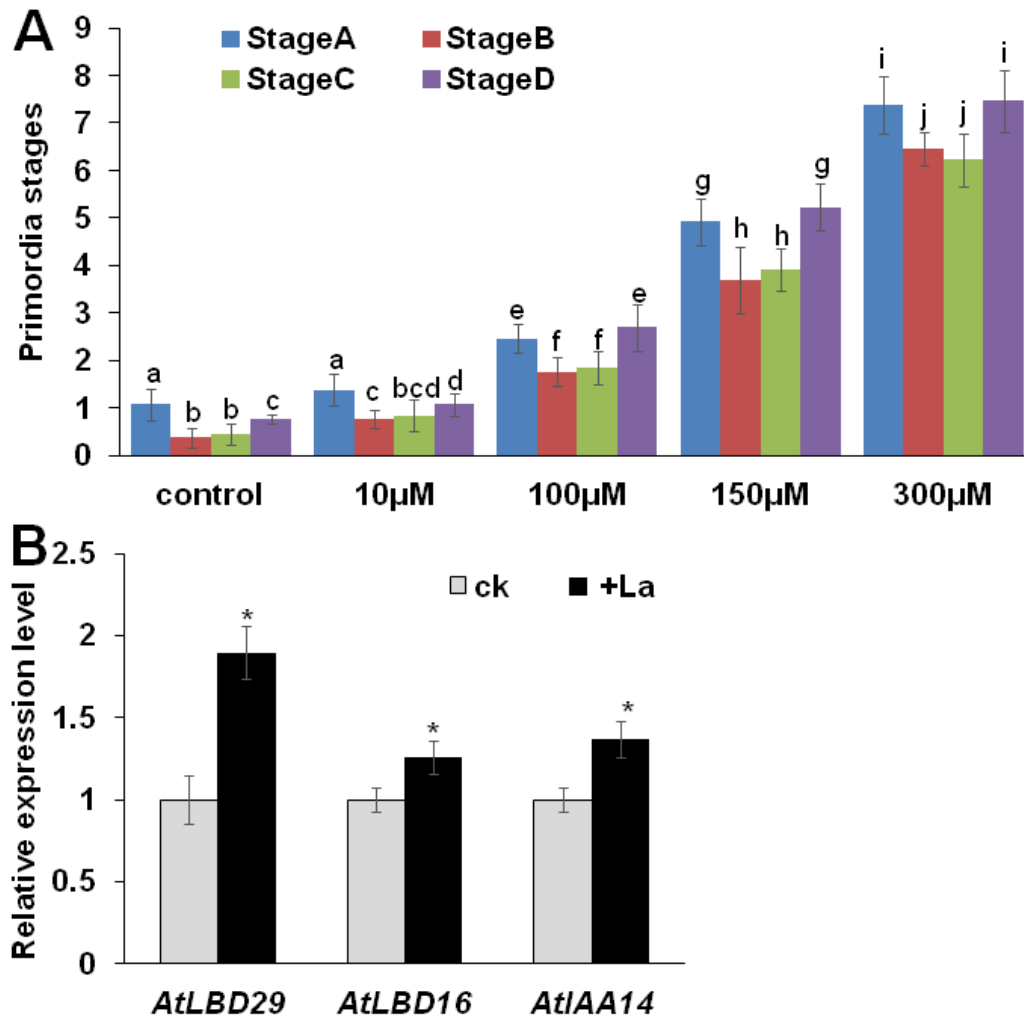

**Fig. S1.** Effect of La on LR development. (A) Five-day-old *DR5:GUS* seedlings grown in 1/2 MS medium were treated with 150  $\mu\text{M}$   $\text{La}(\text{NO}_3)_3$  for 5 d, the lateral root primordia (LRP) initiation was measured. The four developmental stages of LRP were classified as follows: up to three cell layers (stage A); more than three cell layers but not emerged (stage B); emerged lateral roots (LRs)  $<0.5$  mm in length (stage C); and emerged LRs  $>0.5$  mm in length (stage D) (Zhang *et al.*, 1999). Only mature LRs ( $>0.5$  mm) were recorded as LRs. (B) Quantitative RT-PCR analysis of *AtLBD29*, *AtLBD16*, and *AtIAA14* expression in the roots of five-day-old *col-0* seedlings treated with or without 150  $\mu\text{M}$   $\text{La}(\text{NO}_3)_3$  for 2 d. The expression levels of the indicated genes in the untreated roots were set to 1. The error bars represent the SEM.

\*p-value $<0.01$ .

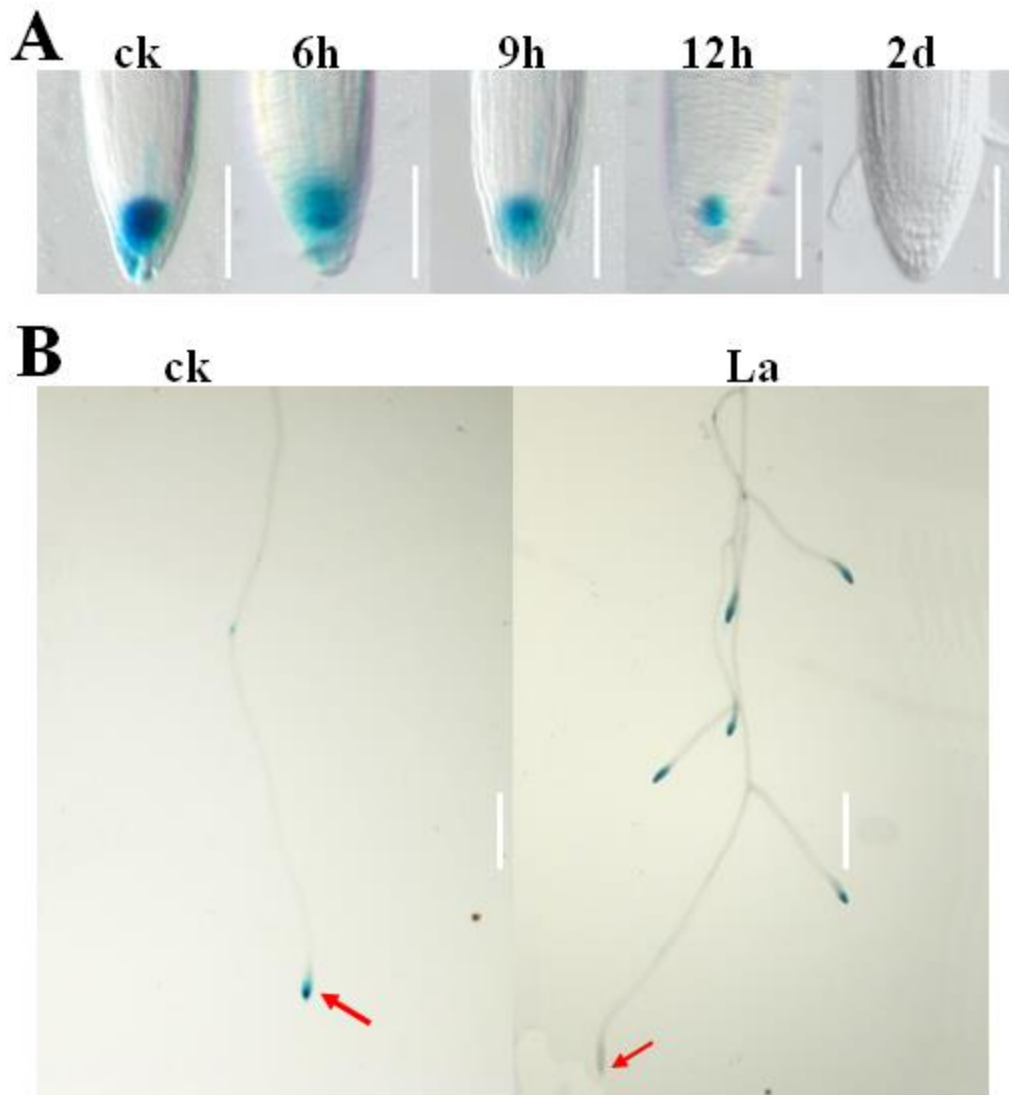

**Fig. S2.** (A) Image of GUS staining of the root tips of primary roots of 5-day-old *DR5::GUS* seedlings exposed to  $150 \mu\text{M La}(\text{NO}_3)_3$  for periods of up to 2 d. Bar,  $100 \mu\text{m}$ . (B) Images of GUS staining of the lateral roots and primary roots. Bar, 1 mm.

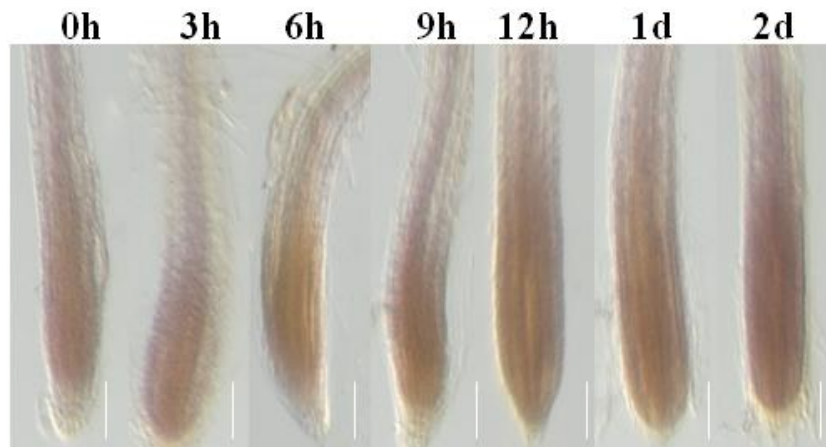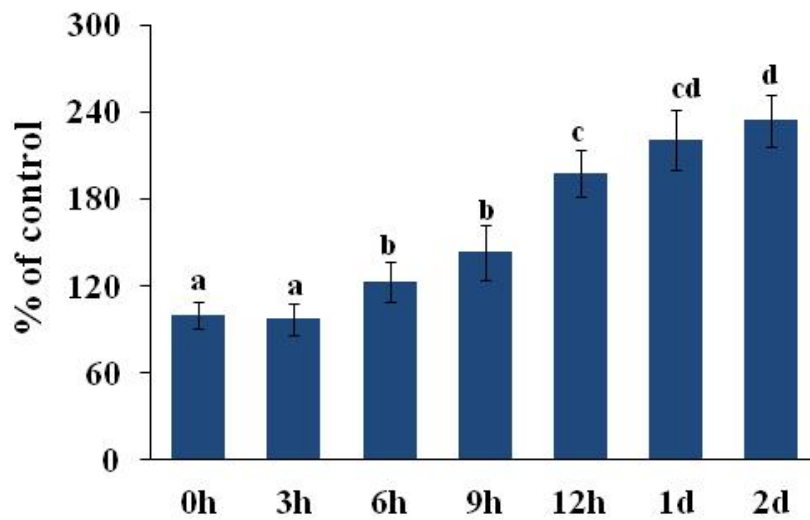

**Fig. S3.** Detection of ROS production in the roots of 5-day-old wild-type seedlings exposed to 150  $\mu\text{M}$   $\text{La}(\text{NO}_3)_3$  for periods of up to 2 d using DAB staining. The error bars represent the SEM. Different letters indicate significantly different values ( $P < 0.05$  by Tukey's test). Bar, 100  $\mu\text{m}$ .

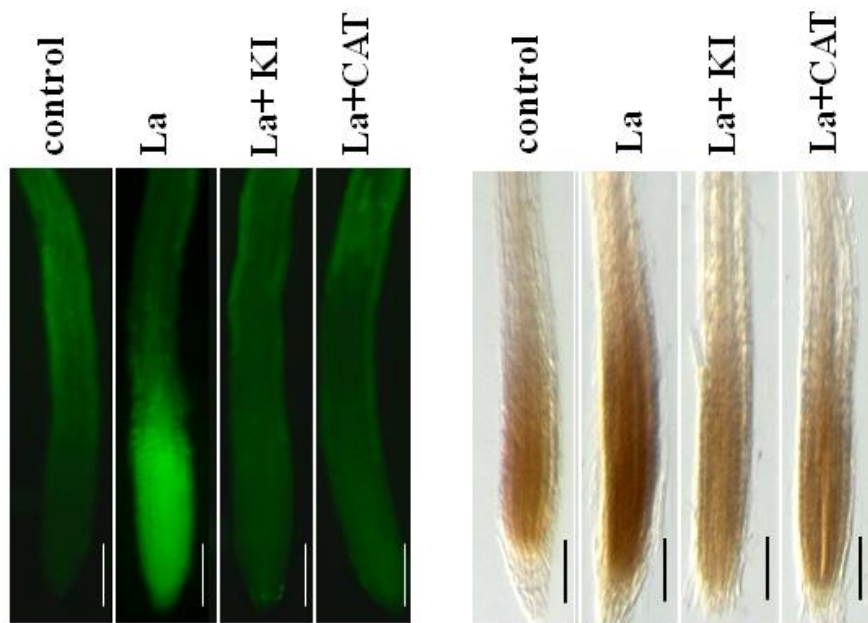

**Fig. S4.** Detection of ROS production in the roots of 5-day-old wild-type seedlings exposed to 150  $\mu\text{M}$   $\text{La}(\text{NO}_3)_3$  for 6 h in the presence or absence of 1 mM KI or 0.2 mM CAT using the ROS-specific fluorescent probe DCFH-DA (left) and DAB staining (right). Bar, 100  $\mu\text{m}$ .

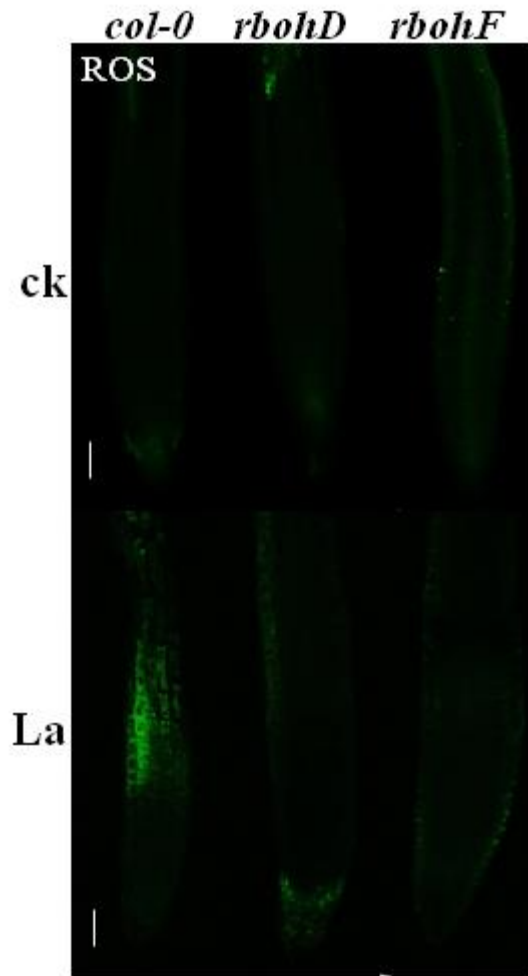

**Fig. S5.** Detection of ROS in the roots of 5-day-old *col-0*, *rbohD*, and *rbohF* seedlings treated with or without 150  $\mu\text{M}$   $\text{La}(\text{NO}_3)_3$  for 12 h using the  $\text{H}_2\text{O}_2$ -specific fluorescent probe DCFH-DA. Bar, 50  $\mu\text{m}$ .

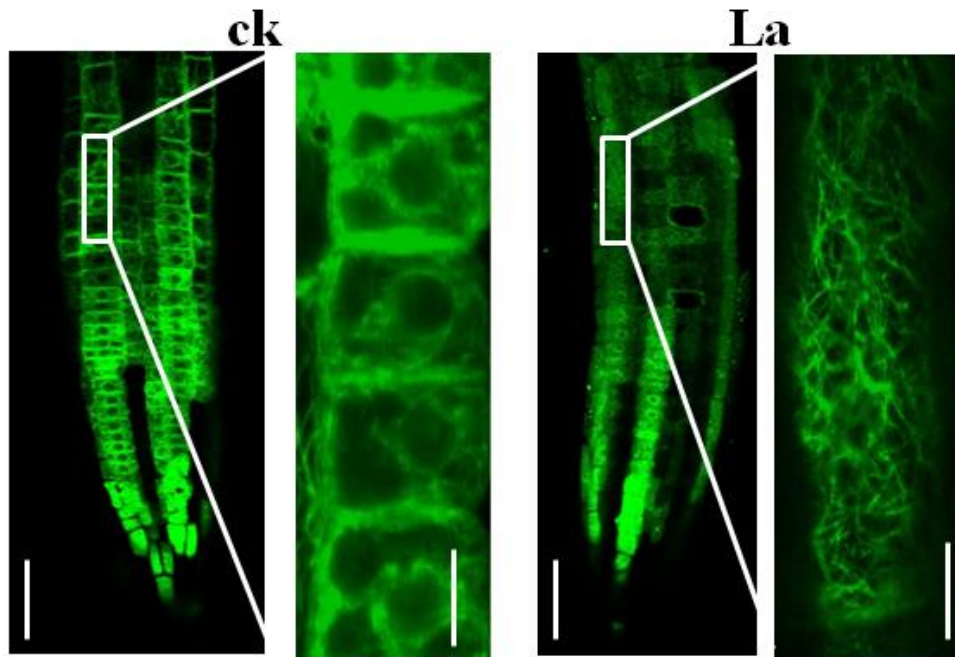

**Fig. S6.** GFP fluorescence in the roots of 5-day-old *ABD2::ABD2-GFP* seedlings exposed to 150  $\mu\text{M}$   $\text{La}(\text{NO}_3)_3$  for 1 d.
